# Supplementary material for: Estimated hospitalisations attributable to seasonal and pandemic influenza in Australia: 2001- 2013
Source: PubMed Central journal article supplement (PMC7153886; doi:10.1371/journal.pone.0230705), 2020-04-13

**The GAM Procedure**

**Dependent Variable: PDresp\_hosp\_allages\_pop\_rate**

**Regression Model Component(s):** week\_before\_Xmas Xmas\_week new\_year\_week  
 1week\_after\_NY 2weeks\_after\_NY 3weeks\_after\_NY week\_Australia\_day one\_week  
 before\_easter easter\_week week\_other\_publicHday\_Azday total\_A noti\_var\_2001 total\_A  
 noti\_var\_2002 total\_A noti\_var\_2003 total\_A noti\_var\_2004 total\_A noti\_var\_2005 total\_A  
 noti\_var\_2006 total\_A noti\_var\_2007 total\_A noti\_var\_2008 total\_A noti\_var\_2009 total\_A  
 noti\_var\_2010 total\_A noti\_var\_2011 total\_A noti\_var\_2012 total\_A noti\_var\_2013 total\_A  
 noti\_var\_2014 total\_B noti\_var\_2001 total\_B noti\_var\_2002 total\_B noti\_var\_2003 total\_B  
 noti\_var\_2004 total\_B noti\_var\_2005 total\_B noti\_var\_2006 total\_B noti\_var\_2007 total\_B  
 noti\_var\_2008 total\_B noti\_var\_2009 total\_B noti\_var\_2010 total\_B noti\_var\_2011 total\_B  
 noti\_var\_2012 total\_B noti\_var\_2013 total\_B noti\_var\_2014  
**Smoothing Model Component(s):** spline(wk\_number)

| Summary of Input Data Set      |          |
|--------------------------------|----------|
| Number of Observations         | 679      |
| Number of Missing Observations | 0        |
| Distribution                   | Gaussian |
| Link Function                  | Identity |

| Iteration Summary and Fit Statistics   |              |
|----------------------------------------|--------------|
| Final Number of Backfitting Iterations | 218          |
| Final Backfitting Criterion            | 9.291372E-16 |
| The Deviance of the Final Estimate     | 882.69079209 |

The backfitting algorithm converged.

| Regression Model Analysis   |                    |                |         |         |
|-----------------------------|--------------------|----------------|---------|---------|
| Parameter Estimates         |                    |                |         |         |
| Parameter                   | Parameter Estimate | Standard Error | t Value | Pr >  t |
| Intercept                   | 30.35056           | 0.14780        | 205.35  | <.0001  |
| week_before_Xmas            | -1.66540           | 0.34239        | -4.86   | <.0001  |
| Xmas_week                   | -7.70067           | 0.35495        | -21.69  | <.0001  |
| new_year_week               | -6.94736           | 0.35535        | -19.55  | <.0001  |
| 1week_after_NY              | -4.42837           | 0.35489        | -12.48  | <.0001  |
| 2weeks_after_NY             | -3.23998           | 0.35484        | -9.13   | <.0001  |
| 3weeks_after_NY             | -1.70920           | 0.39557        | -4.32   | <.0001  |
| week_Australia_day          | -3.73488           | 0.39580        | -9.44   | <.0001  |
| one_week before_easter      | -1.63288           | 0.35491        | -4.60   | <.0001  |
| easter_week                 | -1.61235           | 0.36249        | -4.45   | <.0001  |
| week_other_publicHday_Azday | -2.86775           | 0.36227        | -7.92   | <.0001  |
| total_A noti_var_2001       | 0.04223            | 0.00816        | 5.18    | <.0001  |
| total_A noti_var_2002       | 0.02491            | 0.00296        | 8.42    | <.0001  |
| total_A noti_var_2003       | 0.03574            | 0.00177        | 20.19   | <.0001  |
| total_A noti_var_2004       | 0.05852            | 0.01093        | 5.35    | <.0001  |
| total_A noti_var_2005       | 0.01762            | 0.00472        | 3.74    | 0.0002  |
| total_A noti_var_2006       | 0.01615            | 0.00928        | 1.74    | 0.0823  |
| total_A noti_var_2007       | 0.00642            | 0.00077751     | 8.26    | <.0001  |
| total_A noti_var_2008       | -0.00579           | 0.00482        | -1.20   | 0.2303  |
| total_A noti_var_2009       | 0.00099807         | 0.00010048     | 9.93    | <.0001  |
| total_A noti_var_2010       | 0.00153            | 0.00113        | 1.35    | 0.1767  |
| total_A noti_var_2011       | -0.00041379        | 0.00113        | -0.37   | 0.7145  |

The GAM Procedure

Dependent Variable: PDresp\_hosp\_allages\_pop\_rate

Regression Model Component(s): week\_before\_Xmas Xmas\_week new\_year\_week  
 1week\_after\_NY 2weeks\_after\_NY 3weeks\_after\_NY week\_Australia\_day one\_week  
 before\_easter easter\_week week\_other\_publicHday\_Azday total\_A noti\_var\_2001 total\_A  
 noti\_var\_2002 total\_A noti\_var\_2003 total\_A noti\_var\_2004 total\_A noti\_var\_2005 total\_A  
 noti\_var\_2006 total\_A noti\_var\_2007 total\_A noti\_var\_2008 total\_A noti\_var\_2009 total\_A  
 noti\_var\_2010 total\_A noti\_var\_2011 total\_A noti\_var\_2012 total\_A noti\_var\_2013 total\_A  
 noti\_var\_2014 total\_B noti\_var\_2001 total\_B noti\_var\_2002 total\_B noti\_var\_2003 total\_B  
 noti\_var\_2004 total\_B noti\_var\_2005 total\_B noti\_var\_2006 total\_B noti\_var\_2007 total\_B  
 noti\_var\_2008 total\_B noti\_var\_2009 total\_B noti\_var\_2010 total\_B noti\_var\_2011 total\_B  
 noti\_var\_2012 total\_B noti\_var\_2013 total\_B noti\_var\_2014  
 Smoothing Model Component(s): spline(wk\_number)

| Regression Model Analysis<br>Parameter Estimates |                    |                |         |         |
|--------------------------------------------------|--------------------|----------------|---------|---------|
| Parameter                                        | Parameter Estimate | Standard Error | t Value | Pr >  t |
| total_A noti_var_2012                            | 0.00197            | 0.00028687     | 6.86    | <.0001  |
| total_A noti_var_2013                            | 0.00133            | 0.00234        | 0.57    | 0.5691  |
| total_A noti_var_2014                            | -0.00125           | 0.00212        | -0.59   | 0.5558  |
| total_B noti_var_2001                            | 0.12880            | 0.08543        | 1.51    | 0.1322  |
| total_B noti_var_2002                            | 0.05314            | 0.00973        | 5.46    | <.0001  |
| total_B noti_var_2003                            | 0.14855            | 0.08103        | 1.83    | 0.0673  |
| total_B noti_var_2004                            | -0.02354           | 0.05023        | -0.47   | 0.6395  |
| total_B noti_var_2005                            | 0.03177            | 0.01640        | 1.94    | 0.0533  |
| total_B noti_var_2006                            | 0.05031            | 0.02534        | 1.99    | 0.0476  |
| total_B noti_var_2007                            | 0.01683            | 0.01086        | 1.55    | 0.1216  |
| total_B noti_var_2008                            | 0.01537            | 0.00282        | 5.45    | <.0001  |
| total_B noti_var_2009                            | -0.04557           | 0.02019        | -2.26   | 0.0244  |
| total_B noti_var_2010                            | 0.01437            | 0.01172        | 1.23    | 0.2205  |
| total_B noti_var_2011                            | 0.00526            | 0.00258        | 2.04    | 0.0419  |
| total_B noti_var_2012                            | 0.00388            | 0.00114        | 3.39    | 0.0007  |
| total_B noti_var_2013                            | 0.00516            | 0.00331        | 1.56    | 0.1192  |
| total_B noti_var_2014                            | 0.01321            | 0.01274        | 1.04    | 0.3001  |
| Linear(wk_number)                                | 0.00452            | 0.00039745     | 11.37   | <.0001  |

| Smoothing Model Analysis<br>Fit Summary for Smoothing Components |                     |           |          |                |
|------------------------------------------------------------------|---------------------|-----------|----------|----------------|
| Component                                                        | Smoothing Parameter | DF        | GCV      | Num Unique Obs |
| Spline(wk_number)                                                | 0.994167            | 78.000000 | 1.670416 | 679            |

| Smoothing Model Analysis<br>Analysis of Deviance |          |                |            |            |
|--------------------------------------------------|----------|----------------|------------|------------|
| Source                                           | DF       | Sum of Squares | Chi-Square | Pr > ChiSq |
| Spline(wk_number)                                | 78.00000 | 4108.495548    | 2611.1817  | <.0001     |

**The GAM Procedure**

**Dependent Variable: PDresp\_hosp\_allages\_pop\_rate**

**Regression Model Component(s):** week\_before\_Xmas Xmas\_week new\_year\_week  
1week\_after\_NY 2weeks\_after\_NY 3weeks\_after\_NY week\_Australia\_day one\_week  
before\_easter easter\_week week\_other\_publicHday\_Azday total\_A noti\_var\_2001 total\_A  
noti\_var\_2002 total\_A noti\_var\_2003 total\_A noti\_var\_2004 total\_A noti\_var\_2005 total\_A  
noti\_var\_2006 total\_A noti\_var\_2007 total\_A noti\_var\_2008 total\_A noti\_var\_2009 total\_A  
noti\_var\_2010 total\_A noti\_var\_2011 total\_A noti\_var\_2012 total\_A noti\_var\_2013 total\_A  
noti\_var\_2014 total\_B noti\_var\_2001 total\_B noti\_var\_2002 total\_B noti\_var\_2003 total\_B  
noti\_var\_2004 total\_B noti\_var\_2005 total\_B noti\_var\_2006 total\_B noti\_var\_2007 total\_B  
noti\_var\_2008 total\_B noti\_var\_2009 total\_B noti\_var\_2010 total\_B noti\_var\_2011 total\_B  
noti\_var\_2012 total\_B noti\_var\_2013 total\_B noti\_var\_2014  
**Smoothing Model Component(s):** spline(wk\_number)

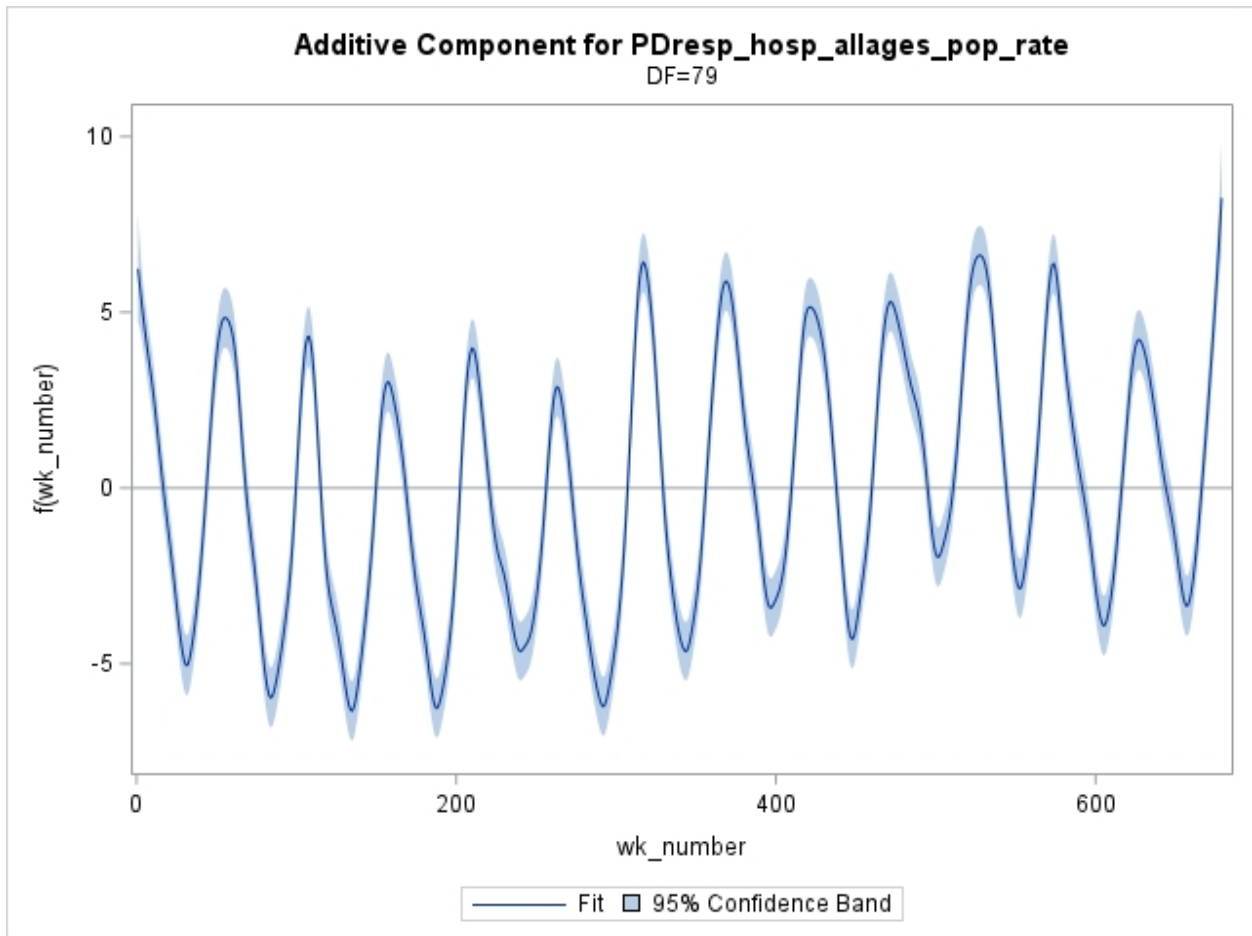

### QQplot of residuals

The UNIVARIATE Procedure

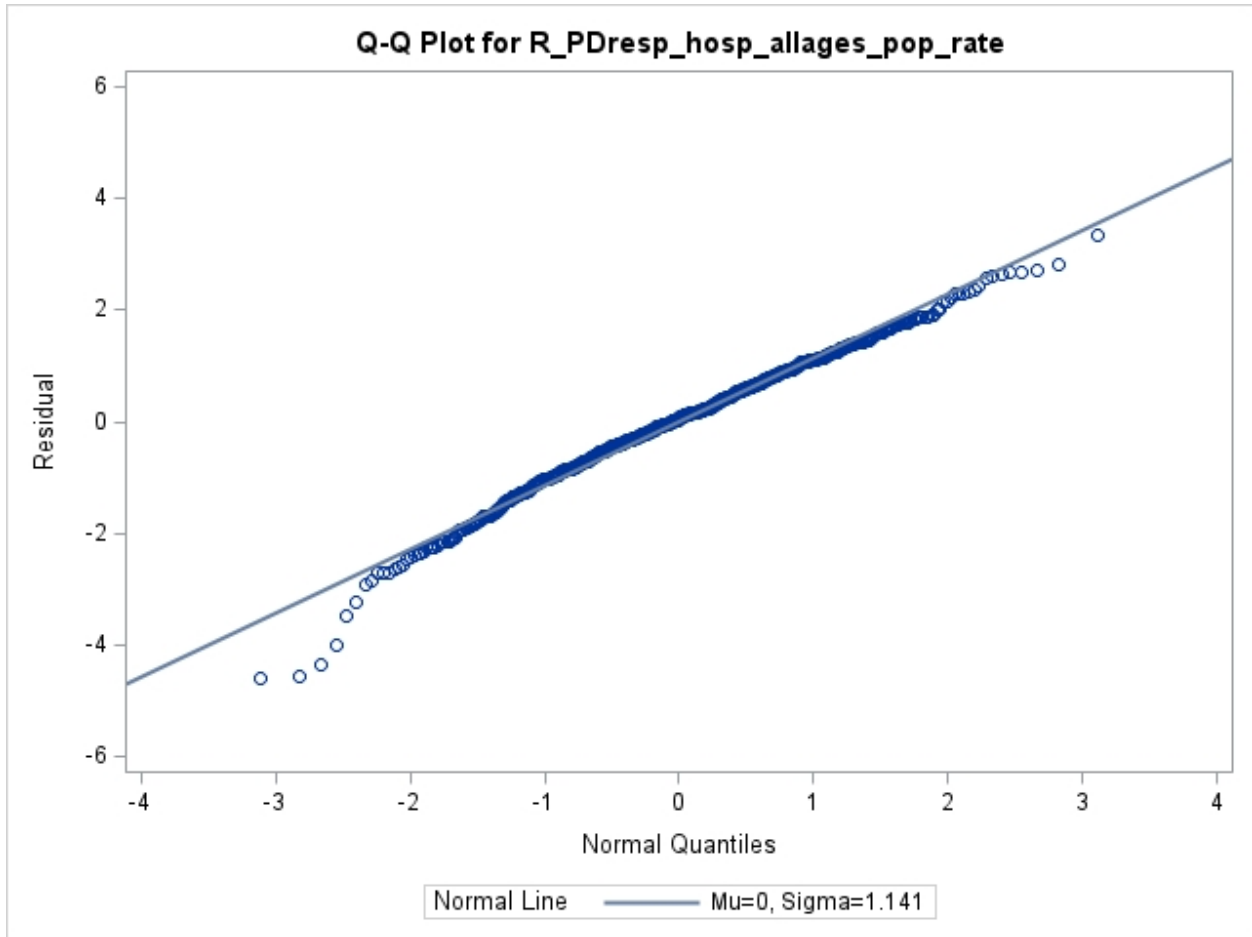

### Autocorrelation plot of residuals

#### The ARIMA Procedure

|                                                          |          |
|----------------------------------------------------------|----------|
| <b>Name of Variable = R_PDresp_hosp_allages_pop_rate</b> |          |
| <b>Mean of Working Series</b>                            | 4.87E-16 |
| <b>Standard Deviation</b>                                | 1.140169 |
| <b>Number of Observations</b>                            | 679      |

| Autocorrelation Check for White Noise |            |    |            |                  |        |        |        |        |        |
|---------------------------------------|------------|----|------------|------------------|--------|--------|--------|--------|--------|
| To Lag                                | Chi-Square | DF | Pr > ChiSq | Autocorrelations |        |        |        |        |        |
| 6                                     | 76.99      | 6  | <.0001     | 0.178            | -0.080 | -0.203 | -0.158 | -0.091 | -0.002 |
| 12                                    | 125.41     | 12 | <.0001     | -0.131           | -0.147 | -0.088 | -0.019 | 0.023  | 0.151  |
| 18                                    | 134.53     | 18 | <.0001     | 0.072            | 0.061  | 0.003  | -0.016 | 0.050  | 0.037  |
| 24                                    | 150.91     | 24 | <.0001     | -0.036           | -0.093 | -0.094 | -0.053 | 0.003  | 0.042  |

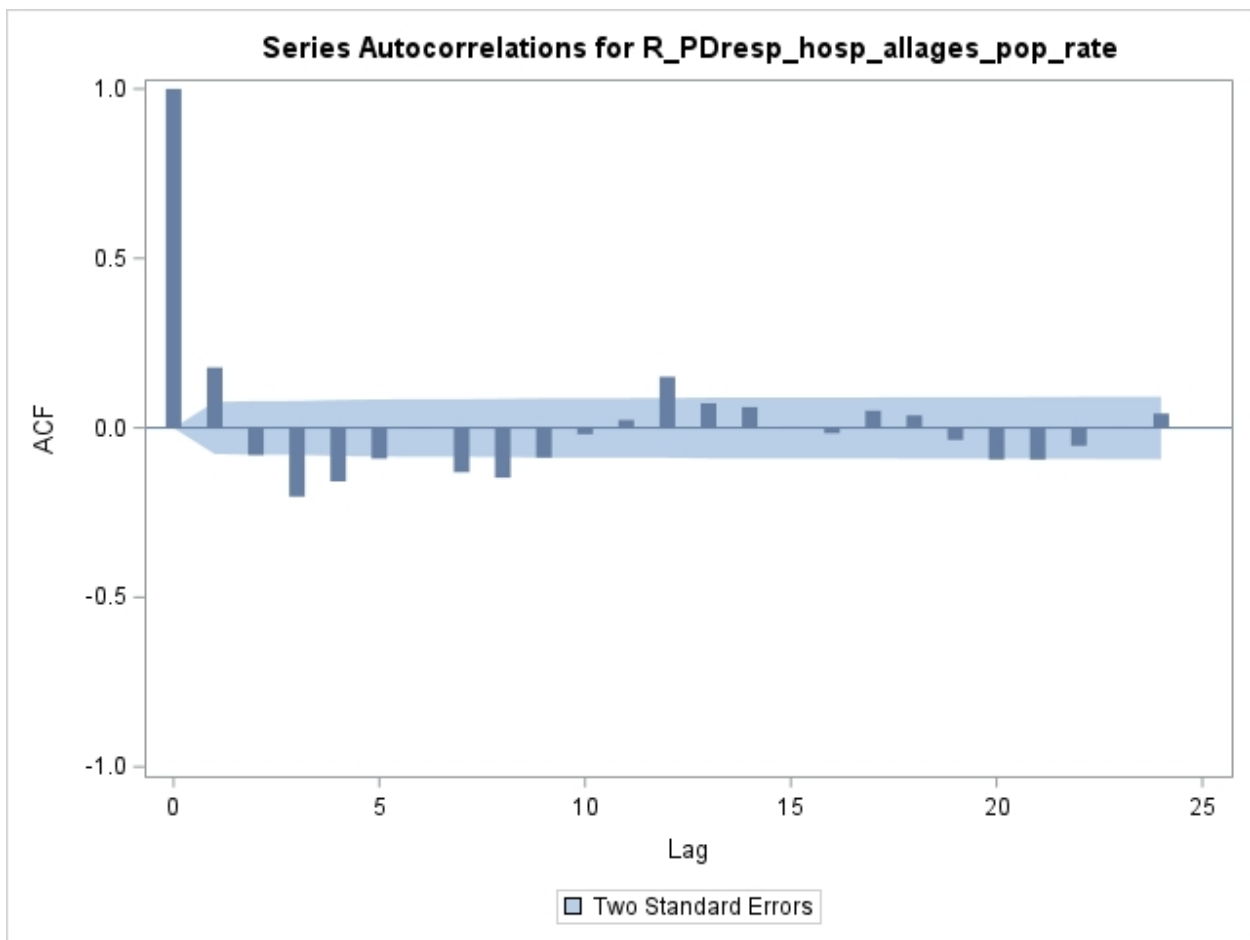

Supplement: pone.0230705.s009.pdf [file pone.0230705.s009.pdf]
