# Supplementary material for: Estimated hospitalisations attributable to seasonal and pandemic influenza in Australia: 2001- 2013
Source: PubMed Central journal article supplement (PMC7153886; doi:10.1371/journal.pone.0230705), 2020-04-13

**The GAM Procedure**

**Dependent Variable: PDresp\_hosp\_allages\_pop\_rate**

**Regression Model Component(s): week\_before\_Xmas Xmas\_week new\_year\_week  
1week\_after\_NY 2weeks\_after\_NY 3weeks\_after\_NY week\_Australia\_day one\_week  
before\_easter easter\_week week\_other\_publicHday\_Azday totalnoti\_var\_2001 totalnoti\_var\_2002  
totalnoti\_var\_2003 totalnoti\_var\_2004 totalnoti\_var\_2005 totalnoti\_var\_2006 totalnoti\_var\_2007  
totalnoti\_var\_2008 totalnoti\_var\_2009 totalnoti\_var\_2010 totalnoti\_var\_2011 totalnoti\_var\_2012  
totalnoti\_var\_2013 totalnoti\_var\_2014**

**Smoothing Model Component(s): spline(wk\_number)**

| Summary of Input Data Set      |          |
|--------------------------------|----------|
| Number of Observations         | 679      |
| Number of Missing Observations | 0        |
| Distribution                   | Gaussian |
| Link Function                  | Identity |

| Iteration Summary and Fit Statistics   |              |
|----------------------------------------|--------------|
| Final Number of Backfitting Iterations | 172          |
| Final Backfitting Criterion            | 9.053673E-16 |
| The Deviance of the Final Estimate     | 900.32725884 |

The backfitting algorithm converged.

| Regression Model Analysis   |                    |                |         |         |
|-----------------------------|--------------------|----------------|---------|---------|
| Parameter Estimates         |                    |                |         |         |
| Parameter                   | Parameter Estimate | Standard Error | t Value | Pr >  t |
| Intercept                   | 30.44110           | 0.12895        | 236.07  | <.0001  |
| week_before_Xmas            | -1.66548           | 0.34052        | -4.89   | <.0001  |
| Xmas_week                   | -7.65344           | 0.35321        | -21.67  | <.0001  |
| new_year_week               | -6.98613           | 0.35317        | -19.78  | <.0001  |
| 1week_after_NY              | -4.42713           | 0.35296        | -12.54  | <.0001  |
| 2weeks_after_NY             | -3.24348           | 0.35291        | -9.19   | <.0001  |
| 3weeks_after_NY             | -1.68049           | 0.39369        | -4.27   | <.0001  |
| week_Australia_day          | -3.75110           | 0.39374        | -9.53   | <.0001  |
| one_week before_easter      | -1.59154           | 0.35309        | -4.51   | <.0001  |
| easter_week                 | -1.60643           | 0.36054        | -4.46   | <.0001  |
| week_other_publicHday_Azday | -2.89731           | 0.36059        | -8.03   | <.0001  |
| totalnoti_var_2001          | 0.04403            | 0.00433        | 10.17   | <.0001  |
| totalnoti_var_2002          | 0.02677            | 0.00163        | 16.46   | <.0001  |
| totalnoti_var_2003          | 0.03459            | 0.00126        | 27.35   | <.0001  |
| totalnoti_var_2004          | 0.04203            | 0.00291        | 14.46   | <.0001  |
| totalnoti_var_2005          | 0.01886            | 0.00140        | 13.45   | <.0001  |
| totalnoti_var_2006          | 0.02412            | 0.00184        | 13.08   | <.0001  |
| totalnoti_var_2007          | 0.00642            | 0.00043752     | 14.66   | <.0001  |
| totalnoti_var_2008          | 0.00932            | 0.00057982     | 16.07   | <.0001  |
| totalnoti_var_2009          | 0.00095107         | 0.00007588     | 12.53   | <.0001  |
| totalnoti_var_2010          | 0.00223            | 0.00043321     | 5.14    | <.0001  |
| totalnoti_var_2011          | 0.00124            | 0.00025081     | 4.96    | <.0001  |
| totalnoti_var_2012          | 0.00218            | 0.00012964     | 16.83   | <.0001  |
| totalnoti_var_2013          | 0.00300            | 0.00025199     | 11.91   | <.0001  |
| totalnoti_var_2014          | 0.00032976         | 0.00071723     | 0.46    | 0.6459  |
| Linear(wk_number)           | 0.00425            | 0.00033477     | 12.70   | <.0001  |

**The GAM Procedure**

**Dependent Variable: PDresp\_hosp\_allages\_pop\_rate**

**Regression Model Component(s):** week\_before\_Xmas Xmas\_week new\_year\_week  
 1week\_after\_NY 2weeks\_after\_NY 3weeks\_after\_NY week\_Australia\_day one\_week  
 before\_easter easter\_week week\_other\_publicHday\_Azday totalnoti\_var\_2001 totalnoti\_var\_2002  
 totalnoti\_var\_2003 totalnoti\_var\_2004 totalnoti\_var\_2005 totalnoti\_var\_2006 totalnoti\_var\_2007  
 totalnoti\_var\_2008 totalnoti\_var\_2009 totalnoti\_var\_2010 totalnoti\_var\_2011 totalnoti\_var\_2012  
 totalnoti\_var\_2013 totalnoti\_var\_2014

**Smoothing Model Component(s):** spline(wk\_number)

| Smoothing Model Analysis             |                     |           |          |                |
|--------------------------------------|---------------------|-----------|----------|----------------|
| Fit Summary for Smoothing Components |                     |           |          |                |
| Component                            | Smoothing Parameter | DF        | GCV      | Num Unique Obs |
| Spline(wk_number)                    | 0.994167            | 78.000000 | 1.703792 | 679            |

| Smoothing Model Analysis |          |                |            |            |
|--------------------------|----------|----------------|------------|------------|
| Analysis of Deviance     |          |                |            |            |
| Source                   | DF       | Sum of Squares | Chi-Square | Pr > ChiSq |
| Spline(wk_number)        | 78.00000 | 4487.751847    | 2866.1326  | <.0001     |

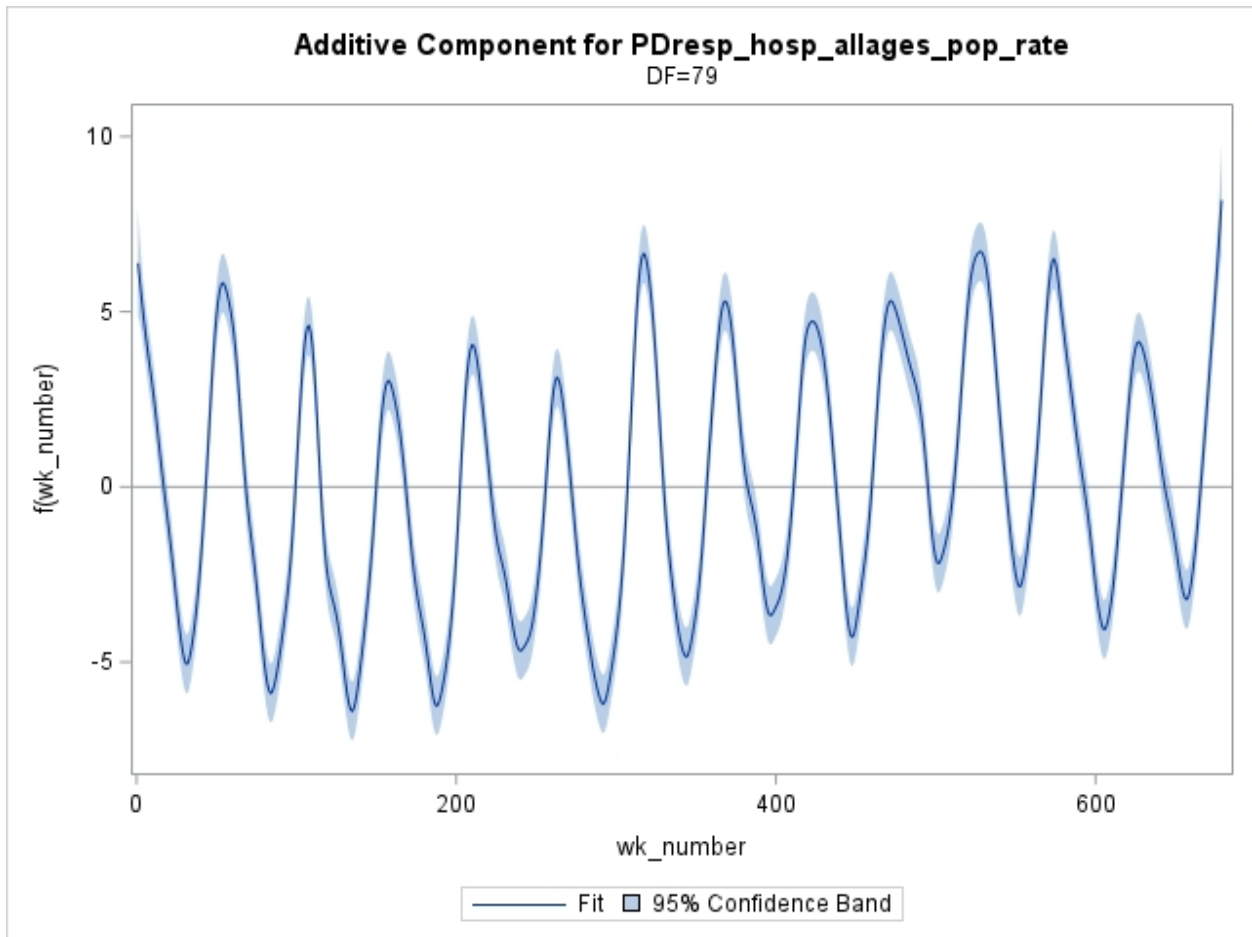

### QQplot of residuals

The UNIVARIATE Procedure

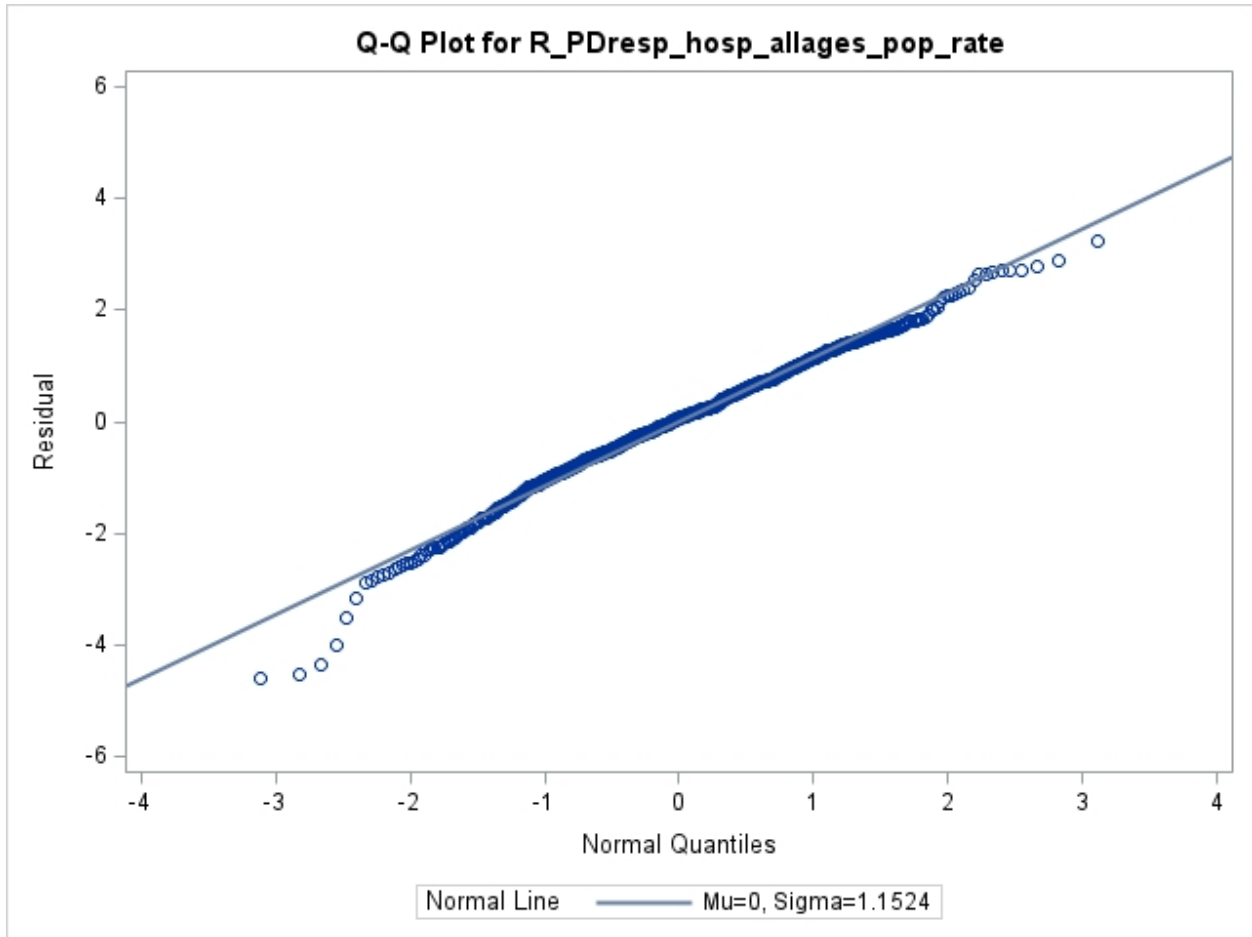

### Autocorrelation plot of residuals

#### The ARIMA Procedure

|                                                          |          |
|----------------------------------------------------------|----------|
| <b>Name of Variable = R_PDresp_hosp_allages_pop_rate</b> |          |
| <b>Mean of Working Series</b>                            | -28E-16  |
| <b>Standard Deviation</b>                                | 1.151504 |
| <b>Number of Observations</b>                            | 679      |

| Autocorrelation Check for White Noise |            |    |            |                  |        |        |        |        |        |
|---------------------------------------|------------|----|------------|------------------|--------|--------|--------|--------|--------|
| To Lag                                | Chi-Square | DF | Pr > ChiSq | Autocorrelations |        |        |        |        |        |
| 6                                     | 81.96      | 6  | <.0001     | 0.194            | -0.068 | -0.205 | -0.155 | -0.106 | -0.014 |
| 12                                    | 135.72     | 12 | <.0001     | -0.135           | -0.152 | -0.107 | -0.022 | 0.038  | 0.153  |
| 18                                    | 146.02     | 18 | <.0001     | 0.086            | 0.059  | 0.008  | -0.009 | 0.053  | 0.032  |
| 24                                    | 165.00     | 24 | <.0001     | -0.036           | -0.105 | -0.096 | -0.061 | -0.008 | 0.043  |

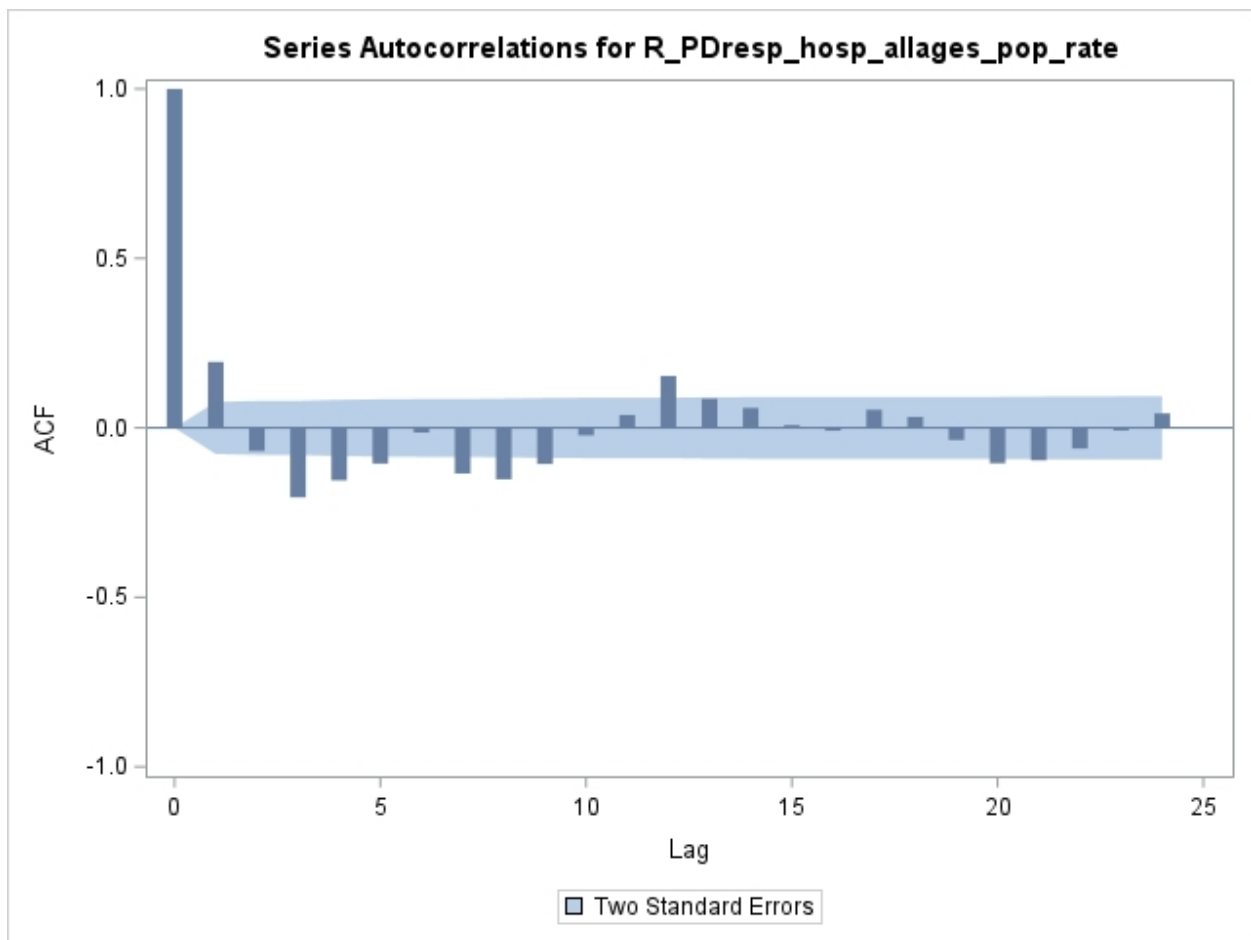

Supplement: pone.0230705.s010.pdf [file pone.0230705.s010.pdf]
