# Supplementary material for: Estimated hospitalisations attributable to seasonal and pandemic influenza in Australia: 2001- 2013
Source: PubMed Central journal article supplement (PMC7153886; doi:10.1371/journal.pone.0230705), 2020-04-13

**Figure S1.** Estimated, all-age average annual rates of influenza-attributable hospitalisations, by diagnosis category using influenza A and B model

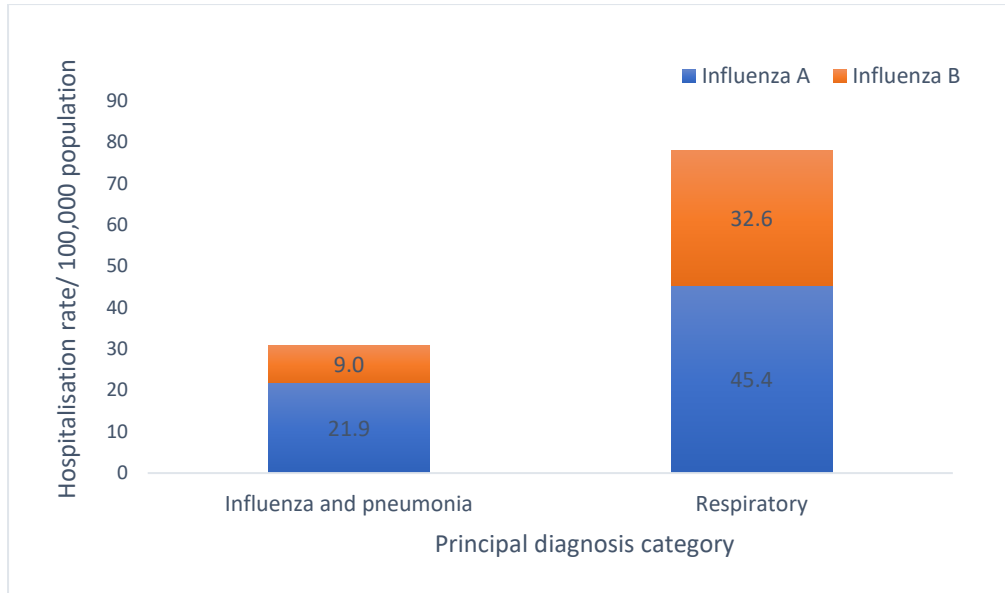

Supplement: pone.0230705.s001.pdf [file pone.0230705.s001.pdf]
