# Supplementary material for: Estimated hospitalisations attributable to seasonal and pandemic influenza in Australia: 2001- 2013
Source: PubMed Central journal article supplement (PMC7153886; doi:10.1371/journal.pone.0230705), 2020-04-13

**Figure S3. Autocorrelation plots for the GAM model with 4, 6 and 8 knots per year and for the harmonic regression model, for all-age respiratory hospitalisation rates/100,000 population, for influenza A and B model**

*4 knots/year*

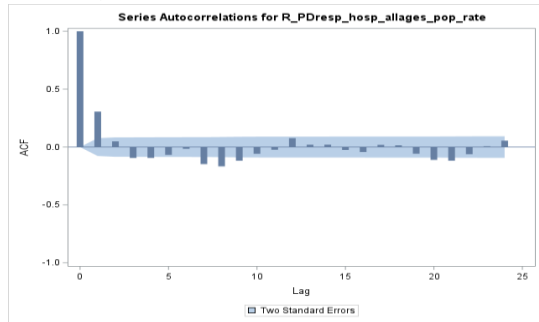

*6 knots/year*

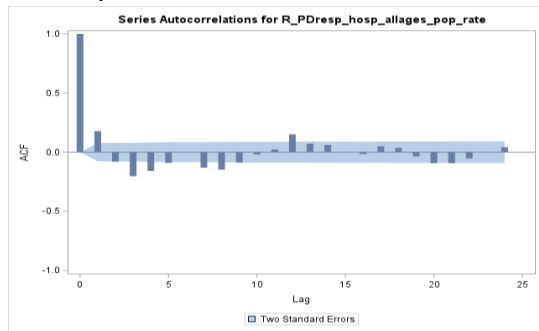

*8 knots/year*

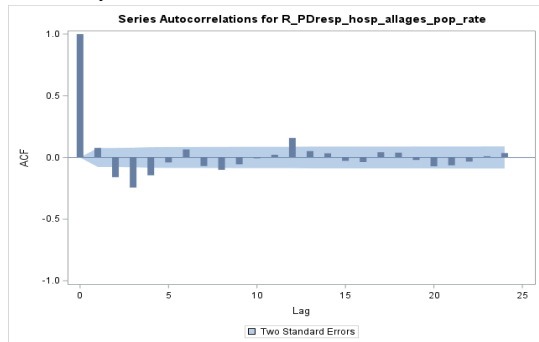

*Harmonic ordinary linear regression*

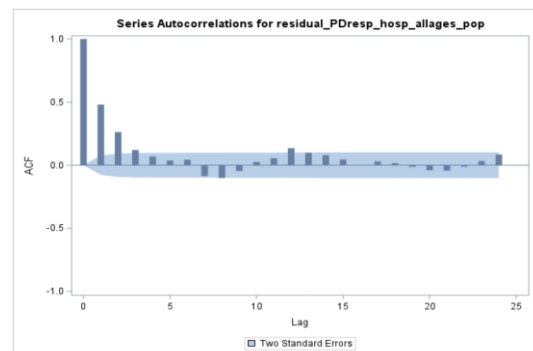

Supplement: pone.0230705.s003.pdf [file pone.0230705.s003.pdf]
