# Supplementary material for: Estimated hospitalisations attributable to seasonal and pandemic influenza in Australia: 2001- 2013
Source: PubMed Central journal article supplement (PMC7153886; doi:10.1371/journal.pone.0230705), 2020-04-13
Supplement: pone.0230705.s004.pdf [file pone.0230705.s004.pdf]

**Table S1. Descriptive summary of average weekly hospitalisation rate per 100,000 population by principal diagnosis and age group, Australia, 2001-2013**

| Principal Diagnosis     | Age group (years) |              |              |            |                |
|-------------------------|-------------------|--------------|--------------|------------|----------------|
|                         | <b>0-14</b>       | <b>15-64</b> | <b>65-84</b> | <b>≥85</b> | <b>All-age</b> |
| Influenza and pneumonia | 5.4               | 3.1          | 19.8         | 64.9       | 6.5            |
| Respiratory             | 47.3              | 17.9         | 75.5         | 162.2      | 32.7           |
