# Supplementary material for: Estimated hospitalisations attributable to seasonal and pandemic influenza in Australia: 2001- 2013
Source: PubMed Central journal article supplement (PMC7153886; doi:10.1371/journal.pone.0230705), 2020-04-13
Supplement: pone.0230705.s005.pdf [file pone.0230705.s005.pdf]

**Table S2. Descriptive statistics of weekly counts of influenza notifications, by influenza type and year, Australia, 2001-2013**

| <b>Year</b>        | <b>Number of notifications (N)</b> | <b>Mean</b> | <b>Medium</b> | <b>Minimum</b> | <b>Maximum</b> | <b>Interquartile range</b> |
|--------------------|------------------------------------|-------------|---------------|----------------|----------------|----------------------------|
| <i>Influenza A</i> |                                    |             |               |                |                |                            |
| 2001 (Jul-Dec)     | 940                                | 36          | 21            | 0              | 119            | 53                         |
| 2002               | 2681                               | 52          | 12            | 0              | 254            | 53                         |
| 2003               | 3129                               | 60          | 8             | 1              | 424            | 18                         |
| 2004               | 1575                               | 30          | 12            | 2              | 149            | 35                         |
| 2005               | 3408                               | 64          | 27            | 4              | 238            | 62                         |
| 2006               | 2343                               | 45          | 20            | 5              | 219            | 44                         |
| 2007               | 9233                               | 178         | 26            | 7              | 1303           | 99                         |
| 2008               | 4029                               | 77          | 39            | 11             | 350            | 68                         |
| 2009               | 58411                              | 1123        | 83            | 19             | 8687           | 1286                       |
| 2010               | 11976                              | 230         | 97            | 25             | 1205           | 219                        |
| 2011               | 19895                              | 375         | 195           | 51             | 1491           | 336                        |
| 2012               | 33908                              | 652         | 110           | 38             | 3016           | 660                        |
| 2013               | 17731                              | 341         | 195           | 86             | 1336           | 258                        |
| <b>All years</b>   | <b>169,259</b>                     | <b>260</b>  | <b>50</b>     | <b>0</b>       | <b>8687</b>    | <b>155</b>                 |
| <i>Influenza B</i> |                                    |             |               |                |                |                            |
| 2001 (Jul-Dec)     | 111                                | 4           | 5             | 0              | 9              | 5                          |
| 2002               | 868                                | 17          | 5             | 0              | 78             | 26                         |
| 2003               | 124                                | 2           | 2             | 0              | 8              | 2                          |
| 2004               | 370                                | 7           | 3             | 0              | 32             | 8                          |
| 2005               | 1000                               | 19          | 9             | 2              | 84             | 21                         |
| 2006               | 877                                | 17          | 7             | 0              | 72             | 24                         |
| 2007               | 956                                | 18          | 10            | 0              | 73             | 25                         |
| 2008               | 5029                               | 97          | 21            | 5              | 681            | 68                         |
| 2009               | 478                                | 9           | 7             | 0              | 31             | 9                          |
| 2010               | 1282                               | 25          | 8             | 0              | 113            | 38                         |
| 2011               | 7328                               | 138         | 35            | 7              | 641            | 194                        |
| 2012               | 10538                              | 203         | 119           | 11             | 792            | 257                        |
| 2013               | 10410                              | 200         | 88            | 17             | 1015           | 215                        |
| <b>All years</b>   | <b>39,371</b>                      | <b>60</b>   | <b>12</b>     | <b>0</b>       | <b>1015</b>    | <b>36</b>                  |
