# Supplementary material for: Estimated hospitalisations attributable to seasonal and pandemic influenza in Australia: 2001- 2013
Source: PubMed Central journal article supplement (PMC7153886; doi:10.1371/journal.pone.0230705), 2020-04-13
Supplement: pone.0230705.s006.pdf [file pone.0230705.s006.pdf]

**Table S3. Estimated annual influenza-attributable hospitalisation rate<sup>a</sup> by influenza type, principal diagnosis, age group and year, Australia, 2001-2013.**

|                         |                | <b>Hospitalization rate – attributable to Influenza A (95%CI)</b> |                             |                             |                              |                             |
|-------------------------|----------------|-------------------------------------------------------------------|-----------------------------|-----------------------------|------------------------------|-----------------------------|
| Principal Diagnosis     | Year           | Age group                                                         |                             |                             |                              |                             |
|                         |                | 0-14 years                                                        | 15-64 years                 | 65-84 years                 | ≥85 years                    | All-ages                    |
| Influenza and Pneumonia | 2001 (Jul-Dec) | <b>19.5 (12.5, 26.5)</b>                                          | <b>14.1 (11.8, 16.5)</b>    | <b>17.1 (2.5, 31.7)</b>     | <b>98.5 (35.2, 161.8)</b>    | <b>16.7 (13.1, 20.3)</b>    |
|                         | 2002           | <b>36.9 (29.7, 44.1)</b>                                          | <b>9.9 (7.5, 12.3)</b>      | <b>61.4 (46.3, 76.5)</b>    | <b>281.7 (216.2, 347.2)</b>  | <b>25.0 (21.3, 28.7)</b>    |
|                         | 2003           | <b>68.7 (63.7, 73.8)</b>                                          | <b>20.6 (18.9, 22.2)</b>    | <b>109.3 (98.7, 119.8)</b>  | <b>374.7 (328.9, 420.4)</b>  | <b>45.3 (42.7, 47.9)</b>    |
|                         | 2004           | <b>37.5 (21.8, 53.2)</b>                                          | <b>17.5 (12.3, 22.6)</b>    | <b>88.6 (55.9, 121.4)</b>   | <b>336.9 (194.8, 479.0)</b>  | <b>34.2 (26.2, 42.2)</b>    |
|                         | 2005           | -0.8 (-15.4, 13.8)                                                | <b>18.5 (13.7, 23.4)</b>    | <b>32.8 (2.1, 63.4)</b>     | <b>462.1 (329.4, 594.8)</b>  | <b>23.0 (15.5, 30.5)</b>    |
|                         | 2006           | 3.5 (-16.3, 23.3)                                                 | <b>7.3 (0.7, 13.8)</b>      | 38.8 (-2.6, 80.3)           | -54.8 (-234.3, 124.8)        | 9.2 (-0.9, 19.4)            |
|                         | 2007           | <b>31.2 (24.7, 37.7)</b>                                          | <b>15.5 (13.4, 17.7)</b>    | <b>46.7 (33.0, 60.3)</b>    | <b>253.0 (193.7, 312.3)</b>  | <b>26.0 (22.7, 29.4)</b>    |
|                         | 2008           | -11.6 (-29.3, 6.1)                                                | <i>-17.5 (-23.3, -11.6)</i> | 36.2 (-0.8, 73.1)           | -97.1 (-257.4, 63.2)         | <i>-11.4 (-20.5, -2.4)</i>  |
|                         | 2009           | <b>42.2 (36.8, 47.5)</b>                                          | <b>37.6 (35.8, 39.4)</b>    | <b>34.5 (23.3, 45.6)</b>    | <b>110.8 (62.4, 159.3)</b>   | <b>39.4 (36.6, 42.1)</b>    |
|                         | 2010           | <b>27.2 (14.9, 39.6)</b>                                          | <b>20.9 (16.9, 25.0)</b>    | 13.4 (-12.4, 39.2)          | -51.4 (-163.2, 60.4)         | <b>20.0 (13.7, 26.3)</b>    |
|                         | 2011           | <i>-29.8 (-50.3, -9.4)</i>                                        | <b>11.4 (4.7, 18.2)</b>     | <b>52.5 (9.7, 95.3)</b>     | 153.0 (-32.7, 338.6)         | 11.1 (0.6, 21.6)            |
|                         | 2012           | <b>18.6 (9.8, 27.5)</b>                                           | <b>19.6 (16.7, 22.5)</b>    | <b>86.6 (68.0, 105.1)</b>   | <b>442.2 (361.8, 522.5)</b>  | <b>35.5 (31.0, 40.0)</b>    |
|                         | 2013           | -15.0 (-52.8, 22.7)                                               | <b>18.1 (5.6, 30.5)</b>     | <b>118.3 (39.4, 197.3)</b>  | 246.0 (-96.5, 588.4)         | <b>28.0 (8.7, 47.3)</b>     |
|                         | Respiratory    | 2001 (Jul-Dec)                                                    | 36.1 (-9.9, 82.1)           | <b>35.5 (26.3, 44.8)</b>    | <b>55.5 (20.4, 90.7)</b>     | <b>173.6 (58.1, 289.0)</b>  |
| 2002                    |                | <b>114.2 (66.6, 161.8)</b>                                        | <b>18.0 (8.4, 27.5)</b>     | <b>208.5 (172.2, 244.9)</b> | <b>585.5 (466.2, 704.9)</b>  | <b>66.8 (51.2, 82.3)</b>    |
| 2003                    |                | <b>129.9 (96.6, 163.1)</b>                                        | <b>51.2 (44.5, 57.8)</b>    | <b>347.9 (322.5, 373.3)</b> | <b>850.2 (766.8, 933.6)</b>  | <b>111.8 (101.0, 122.7)</b> |
| 2004                    |                | 88.1 (-15.3, 191.4)                                               | <b>56.4 (35.7, 77.1)</b>    | <b>260.5 (181.5, 339.4)</b> | <b>481.2 (222.0, 740.4)</b>  | <b>92.2 (58.4, 125.9)</b>   |
| 2005                    |                | -16.5 (-113.0, 80.0)                                              | <b>36.3 (17.0, 55.7)</b>    | <b>222.0 (148.3, 295.7)</b> | <b>896.3 (654.2, 1138.3)</b> | <b>60.1 (28.5, 91.6)</b>    |
| 2006                    |                | 42.3 (-88.3, 172.8)                                               | 21.5 (-4.7, 47.7)           | <b>109.0 (9.3, 208.8)</b>   | 154.0 (-173.4, 481.5)        | 37.8 (-4.8, 80.5)           |
| 2007                    |                | <b>69.4 (26.3, 112.5)</b>                                         | <b>35.4 (26.7, 44.0)</b>    | <b>137.9 (105.0, 170.8)</b> | <b>372.4 (264.3, 480.5)</b>  | <b>59.3 (45.2, 73.3)</b>    |
| 2008                    |                | <i>-89.3 (-205.9, 27.2)</i>                                       | <i>-23.9 (-47.3, -0.5)</i>  | <b>92.1 (3.0, 181.1)</b>    | -25.6 (-318.0, 266.7)        | <i>-23.3 (-61.4, 14.7)</i>  |
| 2009                    |                | 19.7 (-15.6, 54.9)                                                | <b>60.5 (53.4, 67.5)</b>    | <b>74.1 (47.1, 101.0)</b>   | <b>301.1 (212.8, 389.5)</b>  | <b>58.3 (46.8, 69.8)</b>    |
| 2010                    |                | -16.3 (-97.6, 65.0)                                               | <b>31.0 (14.7, 47.3)</b>    | 15.9 (-46.2, 78.0)          | -92.8 (-296.7, 111.1)        | 18.3 (-8.2, 44.9)           |
| 2011                    |                | -88.5 (-223.5, 46.5)                                              | -14.6 (-41.7, 12.5)         | 92.0 (-11.1, 195.1)         | <b>403.9 (65.2, 742.5)</b>   | -8.2 (-52.3, 35.8)          |
| 2012                    |                | -39.8 (-98.2, 18.6)                                               | <b>37.8 (26.1, 49.5)</b>    | <b>266.9 (222.3, 311.5)</b> | <b>866.2 (719.7, 1012.6)</b> | <b>66.8 (47.7, 85.8)</b>    |
| 2013                    |                | -79.7 (-328.6, 169.3)                                             | 25.6 (-24.3, 75.6)          | <b>210.4 (20.3, 400.6)</b>  | -103.3 (-727.8, 521.2)       | 23.6 (-57.7, 104.9)         |
|                         |                | <b>Hospitalization rate – attributable to Influenza B (95%CI)</b> |                             |                             |                              |                             |
| Principal Diagnosis     | Year           | Age group                                                         |                             |                             |                              |                             |
|                         |                | 0-14 years                                                        | 15-64 years                 | 65-84 years                 | ≥85 years                    | All-ages                    |

|                                                                       |                |                            |                          |                             |                             |                           |
|-----------------------------------------------------------------------|----------------|----------------------------|--------------------------|-----------------------------|-----------------------------|---------------------------|
| Influenza and Pneumonia                                               | 2001 (Jul-Dec) | 4.7 (-3.9, 13.4)           | 0.8 (-2.1, 3.6)          | <b>22.9 (4.8, 40.9)</b>     | <b>114.1 (35.8, 192.4)</b>  | <b>5.7 (1.3, 10.1)</b>    |
|                                                                       | 2002           | <b>25.3 (17.7, 33.0)</b>   | <b>8.3 (5.7, 10.8)</b>   | 1.1 (-15.0, 17.2)           | <b>119.2 (49.5, 188.9)</b>  | <b>12.5 (8.6, 16.4)</b>   |
|                                                                       | 2003           | -4.0 (-13.1, 5.2)          | 2.5 (-0.5, 5.6)          | 1.6 (-17.6, 20.7)           | -109.4 (-192.4, -26.5)      | -0.5 (-5.1, 4.2)          |
|                                                                       | 2004           | 5.5 (-11.4, 22.4)          | 1.6 (-4.0, 7.2)          | 33.7 (-1.7, 69.1)           | -98.8 (-252.3, 54.7)        | 4.6 (-4.0, 13.3)          |
|                                                                       | 2005           | <b>27.6 (12.7, 42.6)</b>   | <b>6.1 (1.2, 11.1)</b>   | <b>46.2 (14.9, 77.4)</b>    | -108.7 (-244.2, 26.7)       | <b>13.2 (5.6, 20.9)</b>   |
|                                                                       | 2006           | <b>39.1 (18.8, 59.3)</b>   | <b>9.0 (2.3, 15.6)</b>   | -2.4 (-44.7, 39.9)          | <b>265.4 (82.0, 448.9)</b>  | <b>17.5 (7.2, 27.9)</b>   |
|                                                                       | 2007           | <b>23.0 (13.5, 32.4)</b>   | -1.4 (-4.5, 1.8)         | -14.0 (-33.8, 5.8)          | -209.7 (-295.4, -124.0)     | -1.5 (-6.3, 3.4)          |
|                                                                       | 2008           | <b>32.1 (19.2, 45.0)</b>   | <b>22.8 (18.5, 27.1)</b> | <b>37.4 (10.4, 64.5)</b>    | <b>190.0 (72.8, 307.3)</b>  | <b>29.1 (22.4, 35.7)</b>  |
|                                                                       | 2009           | -9.6 (-18.4, -0.8)         | -14.0 (-16.9, -11.1)     | <b>21.9 (3.6, 40.3)</b>     | <b>107.7 (28.0, 187.3)</b>  | -6.9 (-11.4, -2.4)        |
|                                                                       | 2010           | -1.8 (-15.5, 11.9)         | -7.0 (-11.5, -2.5)       | 23.0 (-5.6, 51.6)           | <b>214.1 (90.1, 338.1)</b>  | 1.4 (-5.6, 8.4)           |
|                                                                       | 2011           | <b>45.5 (28.3, 62.7)</b>   | 1.4 (-4.3, 7.1)          | -38.6 (-74.6, -2.6)         | -214.3 (-370.3, -58.3)      | 1.0 (-7.8, 9.8)           |
|                                                                       | 2012           | <b>18.1 (7.2, 29.1)</b>    | <b>7.4 (3.8, 11.1)</b>   | <b>32.7 (9.8, 55.7)</b>     | <b>174.5 (75.1, 274.0)</b>  | <b>15.7 (10.0, 21.3)</b>  |
|                                                                       | 2013           | <b>43.4 (12.0, 74.7)</b>   | 10.2 (-0.2, 20.6)        | -43.8 (-109.4, 21.8)        | -53.2 (-337.7, 231.2)       | 9.0 (-7.1, 25.0)          |
| Respiratory                                                           | 2001 (Jul-Dec) | 21.5 (-35.5, 78.4)         | -5.4 (-16.8, 6.0)        | <b>98.4 (54.9, 141.9)</b>   | <b>156.8 (14.0, 299.6)</b>  | 14.3 (-4.3, 32.9)         |
|                                                                       | 2002           | <b>86.9 (36.2, 137.6)</b>  | <b>28.8 (18.7, 39.0)</b> | <b>44.9 (6.2, 83.7)</b>     | <b>289.0 (161.8, 416.1)</b> | <b>46.1 (29.6, 62.7)</b>  |
|                                                                       | 2003           | 34.2 (-26.1, 94.6)         | <b>17.7 (5.6, 29.8)</b>  | -1.3 (-47.4, 44.8)          | -27.6 (-178.9, 123.7)       | 18.4 (-1.3, 38.1)         |
|                                                                       | 2004           | -16.3 (-127.9, 95.2)       | -15.1 (-37.4, 7.3)       | 42.9 (-42.4, 128.1)         | -28.2 (-308.0, 251.7)       | -8.7 (-45.1, 27.7)        |
|                                                                       | 2005           | 64.3 (-34.2, 162.8)        | 19.5 (-0.3, 39.2)        | <b>70.7 (-4.6, 145.9)</b>   | -135.3 (-382.3, 111.8)      | 31.8 (-0.4, 63.9)         |
|                                                                       | 2006           | 60.4 (-70.3, 193.8)        | 22.0 (-4.7, 48.8)        | 101.7 (-0.2, 203.7)         | <b>381.1 (46.4, 715.7)</b>  | <b>44.1 (0.6, 87.7)</b>   |
|                                                                       | 2007           | <b>122.7 (60.4, 185.0)</b> | 0.2 (-12.3, 12.7)        | -44.7 (-92.3, 2.9)          | -168.2 (-324.5, -11.9)      | 16.1 (-4.2, 36.4)         |
|                                                                       | 2008           | <b>94.5 (9.3, 179.7)</b>   | <b>52.9 (35.8, 70.0)</b> | <b>138.9 (73.8, 204.0)</b>  | <b>432.9 (219.2, 646.7)</b> | <b>77.3 (49.5, 105.1)</b> |
|                                                                       | 2009           | -46.6 (-104.5, 11.3)       | -31.0 (-42.7, -19.4)     | <b>46.0 (1.8, 90.3)</b>     | <b>158.9 (13.6, 304.2)</b>  | -21.8 (-40.7, -2.9)       |
|                                                                       | 2010           | <b>103.2 (13.0, 193.3)</b> | -8.1 (-26.1, 10.0)       | 4.8 (-64.0, 73.7)           | <b>239.8 (13.7, 466.0)</b>  | 18.4 (-11.0, 47.9)        |
|                                                                       | 2011           | <b>153.4 (40.0, 266.8)</b> | <b>28.1 (5.3, 50.8)</b>  | -22.1 (-108.7, 64.6)        | -375.1 (-659.6, -90.6)      | <b>38.5 (1.5, 75.6)</b>   |
|                                                                       | 2012           | 51.4 (-20.9, 123.7)        | <b>17.7 (3.2, 32.2)</b>  | <b>123.3 (68.1, 178.5)</b>  | <b>233.0 (51.6, 414.4)</b>  | <b>40.9 (17.3, 64.5)</b>  |
|                                                                       | 2013           | 140.0 (-66.8, 346.8)       | 30.1 (-11.3, 71.6)       | -16.3 (-174.3, 141.7)       | 381.6 (-137.2, 900.4)       | 53.8 (-13.8, 121.3)       |
| <b>Hospitalization rate – attributable to total influenza (95%CI)</b> |                |                            |                          |                             |                             |                           |
| Principal Diagnosis                                                   | Year           | Age group                  |                          |                             |                             |                           |
|                                                                       |                | 0-14 years                 | 15-64 years              | 65-84 years                 | ≥85 years                   | All-ages                  |
| Influenza and Pneumonia                                               | 2001 (Jul-Dec) | <b>24.3 (19.5, 29.1)</b>   | <b>17.4 (15.8, 19.0)</b> | <b>28.9 (19.1, 38.7)</b>    | <b>148.0 (104.6, 191.4)</b> | <b>21.9 (19.5, 24.3)</b>  |
|                                                                       | 2002           | <b>54.4 (48.9, 59.9)</b>   | <b>15.1 (13.3, 17.0)</b> | <b>75.7 (64.4, 87.0)</b>    | <b>386.5 (336.4, 436.6)</b> | <b>35.1 (32.3, 37.9)</b>  |
|                                                                       | 2003           | <b>71.4 (67.4, 75.5)</b>   | <b>22.2 (20.9, 23.6)</b> | <b>117.5 (109.1, 125.9)</b> | <b>370.7 (333.6, 407.9)</b> | <b>47.8 (45.8, 49.9)</b>  |
|                                                                       | 2004           | <b>43.5 (38.0, 49.0)</b>   | <b>19.3 (17.5, 21.1)</b> | <b>117.8 (106.5, 129.2)</b> | <b>267.1 (216.9, 317.4)</b> | <b>39.0 (36.2, 41.8)</b>  |
|                                                                       | 2005           | <b>21.0 (15.0, 26.9)</b>   | <b>23.8 (21.8, 25.7)</b> | <b>70.3 (58.1, 82.6)</b>    | <b>374.5 (320.5, 428.5)</b> | <b>33.8 (30.8, 36.8)</b>  |
|                                                                       | 2006           | <b>38.3 (32.7, 44.0)</b>   | <b>15.7 (13.8, 17.5)</b> | <b>39.7 (28.1, 51.4)</b>    | <b>165.7 (114.2, 217.2)</b> | <b>25.2 (22.3, 28.1)</b>  |

|             |                |                             |                          |                             |                                |                             |
|-------------|----------------|-----------------------------|--------------------------|-----------------------------|--------------------------------|-----------------------------|
|             | 2007           | <b>39.7 (35.5, 44.0)</b>    | <b>16.3 (14.9, 17.7)</b> | <b>46.0 (37.2, 54.8)</b>    | <b>215.9 (177.0, 254.9)</b>    | <b>27.5 (25.4, 29.7)</b>    |
|             | 2008           | <b>34.2 (29.3, 39.2)</b>    | <b>18.4 (16.7, 20.0)</b> | <b>71.9 (61.8, 82.0)</b>    | <b>185.2 (140.5, 229.9)</b>    | <b>30.4 (27.9, 32.9)</b>    |
|             | 2009           | <b>41.4 (37.3, 45.5)</b>    | <b>36.2 (34.8, 37.6)</b> | <b>37.5 (29.0, 46.1)</b>    | <b>125.5 (87.8, 163.2)</b>     | <b>38.9 (36.8, 41.0)</b>    |
|             | 2010           | <b>27.9 (22.6, 33.3)</b>    | <b>18.2 (16.4, 20.0)</b> | <b>26.6 (15.6, 37.6)</b>    | <b>62.5 (13.9, 111.1)</b>      | <b>21.8 (19.1, 24.5)</b>    |
|             | 2011           | <b>21.8 (15.5, 28.2)</b>    | <b>13.1 (11.0, 15.2)</b> | <i>7.5 (-5.6, 20.6)</i>     | <i>-96.6 (-154.4, -38.8)</i>   | <b>12.1 (8.9, 15.3)</b>     |
|             | 2012           | <b>30.3 (25.0, 35.6)</b>    | <b>26.4 (24.6, 28.1)</b> | <b>116.5 (105.5, 127.5)</b> | <b>597.8 (549.2, 646.4)</b>    | <b>48.8 (46.1, 51.5)</b>    |
|             | 2013           | <b>38.3 (31.7, 44.9)</b>    | <b>28.2 (26.0, 30.4)</b> | <b>52.3 (38.8, 65.8)</b>    | <b>161.6 (101.8, 221.4)</b>    | <b>35.6 (32.3, 39.0)</b>    |
| Respiratory | 2001 (Jul-Dec) | <b>48.2 (17.2, 79.3)</b>    | <b>41.7 (35.4, 48.0)</b> | <b>97.8 (74.2, 121.3)</b>   | <b>270.9 (193.0, 348.9)</b>    | <b>52.4 (42.3, 62.5)</b>    |
|             | 2002           | <b>169.3 (133.4, 205.1)</b> | <b>32.5 (25.3, 39.7)</b> | <b>269.9 (242.7, 297.2)</b> | <b>825.3 (735.3, 915.2)</b>    | <b>98.0 (86.3, 109.7)</b>   |
|             | 2003           | <b>139.1 (112.6, 165.7)</b> | <b>57.1 (51.8, 62.5)</b> | <b>369.6 (349.4, 389.8)</b> | <b>888.7 (822.0, 955.4)</b>    | <b>120.7 (112.1, 129.4)</b> |
|             | 2004           | <b>73.7 (37.8, 109.7)</b>   | <b>45.1 (37.8, 52.3)</b> | <b>300.3 (273.0, 327.5)</b> | <b>475.3 (385.1, 565.5)</b>    | <b>86.3 (74.6, 98.0)</b>    |
|             | 2005           | <i>29.6 (-9.1, 68.2)</i>    | <b>53.8 (46.0, 61.6)</b> | <b>284.8 (255.5, 314.2)</b> | <b>783.3 (686.3, 880.3)</b>    | <b>86.3 (73.7, 98.9)</b>    |
|             | 2006           | <b>100.7 (63.9, 137.6)</b>  | <b>42.9 (35.5, 50.3)</b> | <b>207.9 (179.9, 235.9)</b> | <b>484.7 (392.2, 577.2)</b>    | <b>80.1 (68.1, 92.1)</b>    |
|             | 2007           | <b>108.9 (81.0, 136.7)</b>  | <b>37.9 (32.3, 43.5)</b> | <b>134.1 (112.9, 155.2)</b> | <b>351.1 (281.2, 421.1)</b>    | <b>67.9 (58.8, 76.9)</b>    |
|             | 2008           | <b>65.1 (33.1, 97.1)</b>    | <b>53.3 (46.8, 59.7)</b> | <b>240.1 (215.8, 264.4)</b> | <b>546.1 (465.8, 626.4)</b>    | <b>85.4 (75.0, 95.8)</b>    |
|             | 2009           | <i>14.1 (-12.9, 41.1)</i>   | <b>57.2 (51.7, 62.6)</b> | <b>80.5 (60.0, 101.0)</b>   | <b>323.9 (256.2, 391.6)</b>    | <b>56.1 (47.4, 64.9)</b>    |
|             | 2010           | <b>40.5 (5.8, 75.3)</b>     | <b>28.4 (21.4, 35.4)</b> | <i>19.2 (-7.1, 45.6)</i>    | <i>31.5 (-55.8, 118.7)</i>     | <b>29.7 (18.3, 41.0)</b>    |
|             | 2011           | <b>78.6 (37.2, 120.0)</b>   | <b>17.7 (9.4, 26.0)</b>  | <b>64.9 (33.5, 96.3)</b>    | <i>-31.2 (-135.1, 72.6)</i>    | <b>34.1 (20.6, 47.5)</b>    |
|             | 2012           | <i>-22.2 (-57.0, 12.5)</i>  | <b>52.4 (45.4, 59.4)</b> | <b>369.7 (343.3, 396.1)</b> | <b>1120.0 (1032.7, 1207.2)</b> | <b>97.2 (85.9, 108.5)</b>   |
|             | 2013           | <b>91.3 (48.5, 134.1)</b>   | <b>58.9 (50.2, 67.5)</b> | <b>168.1 (135.6, 200.6)</b> | <b>377.8 (270.3, 485.2)</b>    | <b>84.6 (70.7, 98.6)</b>    |

<sup>a</sup> Rate per 100,000 population; Positive statistically significant estimates are shown in bold and negative statistically significant estimates are presented by italics.
