# Supplementary material for: Estimated hospitalisations attributable to seasonal and pandemic influenza in Australia: 2001- 2013
Source: PubMed Central journal article supplement (PMC7153886; doi:10.1371/journal.pone.0230705), 2020-04-13
Supplement: pone.0230705.s007.pdf [file pone.0230705.s007.pdf]

**Table S4. Estimated annual influenza-attributable hospitalisation counts by influenza type, principal diagnosis, age group and year, Australia, 2001-2013.**

|                         |                | Number of hospitalizations – attributable to Influenza A (95%CI) |                              |                             |                             |                                |
|-------------------------|----------------|------------------------------------------------------------------|------------------------------|-----------------------------|-----------------------------|--------------------------------|
| Principal Diagnosis     | Year           | Age group                                                        |                              |                             |                             |                                |
|                         |                | 0-14 years                                                       | 15-64 years                  | 65-84 years                 | ≥85 years                   | All-ages                       |
| Influenza and Pneumonia | 2001 (Jul-Dec) | <b>771 (495, 1,048)</b>                                          | <b>1,828 (1,529, 2,126)</b>  | <b>370 (54, 686)</b>        | <b>261 (93, 429)</b>        | <b>3,227 (2,537, 3,917)</b>    |
|                         | 2002           | <b>1463 (1177, 1749)</b>                                         | <b>1299 (986, 1611)</b>      | <b>1349 (1017, 1680)</b>    | <b>769 (591, 948)</b>       | <b>4,876 (4,155, 5,597)</b>    |
|                         | 2003           | <b>2729 (2529, 2929)</b>                                         | <b>2729 (2507, 2950)</b>     | <b>2446 (2210, 2682)</b>    | <b>1,051 (923, 1,179)</b>   | <b>8,951 (8,441, 9,461)</b>    |
|                         | 2004           | <b>1492 (868, 2115)</b>                                          | <b>2346 (1649, 3042)</b>     | <b>2021 (1273, 2768)</b>    | <b>976 (564, 1388)</b>      | <b>6,837 (5,234, 8,440)</b>    |
|                         | 2005           | -32 (-615, 551)                                                  | <b>2,517 (1,858, 3,175)</b>  | <b>757 (50, 1,465)</b>      | <b>1,401 (999, 1,804)</b>   | <b>4,642 (3,129, 6,155)</b>    |
|                         | 2006           | 142 (-652, 935)                                                  | <b>1005 (100, 1910)</b>      | 914 (-60, 1888)             | -176 (-752, 400)            | 1894 (-183, 3971)              |
|                         | 2007           | <b>1,264 (999, 1,529)</b>                                        | <b>2,187 (1,883, 2,492)</b>  | <b>1,122 (793, 1,451)</b>   | <b>857 (656, 1,058)</b>     | <b>5,430 (4,732, 6,128)</b>    |
|                         | 2008           | -476 (-1202, 251)                                                | -2514 (-3356, -1673)         | 891 (-20, 1801)             | -345 (-913, 224)            | -2,439 (-4,367, -510)          |
|                         | 2009           | <b>1,755 (1,533, 1,977)</b>                                      | <b>5510 (5251, 5769)</b>     | <b>871 (589, 1153)</b>      | <b>409 (230, 588)</b>       | <b>8,544 (7,950, 9,138)</b>    |
|                         | 2010           | <b>1,145 (626, 1,663)</b>                                        | <b>3,114 (2,508, 3,721)</b>  | 350 (-325, 1,025)           | -200 (-636, 235)            | <b>4,419 (3,025, 5,813)</b>    |
|                         | 2011           | -1,265 (-2,133, -397)                                            | <b>1,721 (703, 2,739)</b>    | <b>1,414 (261, 2,567)</b>   | 619 (-132, 1,370)           | <b>2,488 (144, 4,832)</b>      |
|                         | 2012           | <b>802 (421, 1,183)</b>                                          | <b>2,984 (2,538, 3,430)</b>  | <b>2,428 (1,908, 2,947)</b> | <b>1,864 (1,525, 2,202)</b> | <b>8,078 (7,047, 9,110)</b>    |
|                         | 2013           | -657 (-2,310, 995)                                               | <b>2,788 (860, 4,717)</b>    | <b>3,446 (1,146, 5,746)</b> | 1,082 (-424, 2,588)         | <b>6,492 (2,014, 10,970)</b>   |
| Respiratory             | 2001 (Jul-Dec) | 1,430 (-393, 3,253)                                              | <b>4,593 (3,400, 5,786)</b>  | <b>1,200 (440, 1,961)</b>   | <b>460 (154, 766)</b>       | <b>7,667 (4,765, 10,569)</b>   |
|                         | 2002           | <b>4,528 (2,641, 6,415)</b>                                      | <b>2,351 (1,103, 3,600)</b>  | <b>4,580 (3,782, 5,379)</b> | <b>1,599 (1,273, 1,925)</b> | <b>13,034 (10,001, 16,066)</b> |
|                         | 2003           | <b>5,156 (3,836, 6,475)</b>                                      | <b>6,787 (5,902, 7,671)</b>  | <b>7,785 (7,216, 8,353)</b> | <b>2,384 (2,151, 2,618)</b> | <b>22,091 (19,947, 24,235)</b> |
|                         | 2004           | 3,501 (-607, 7,610)                                              | <b>7,579 (4,794, 10,364)</b> | <b>5,938 (4,139, 7,738)</b> | <b>1,394 (643, 2,145)</b>   | <b>18,417 (11,675, 25,159)</b> |
|                         | 2005           | -656 (-4,501, 3,188)                                             | <b>4,941 (2,310, 7,572)</b>  | <b>5,132 (3,429, 6,836)</b> | <b>2,718 (1,984, 3,452)</b> | <b>12,128 (5,765, 18,490)</b>  |
|                         | 2006           | 1,695 (-3,538, 6,927)                                            | 2,974 (-643, 6,592)          | <b>2,565 (219, 4,911)</b>   | 494 (-557, 1,546)           | 7,759 (-978, 16,496)           |
|                         | 2007           | <b>2,813 (1,066, 4,559)</b>                                      | <b>4,980 (3,764, 6,197)</b>  | <b>3,316 (2,524, 4,108)</b> | <b>1,261 (895, 1,627)</b>   | <b>12,370 (9,433, 15,307)</b>  |
|                         | 2008           | -3,671 (-8,461, 1,118)                                           | -3,439 (-6,802, -76)         | <b>2,268 (75, 4,461)</b>    | -91 (-1,129, 947)           | -4,970 (-13,082, 3,142)        |
|                         | 2009           | 819 (-647, 2,284)                                                | <b>8859 (7824, 9894)</b>     | <b>1,871 (1,191, 2,551)</b> | <b>1,112 (785, 1,438)</b>   | <b>12,654 (10,157, 15,151)</b> |
|                         | 2010           | -686 (-4,105, 2,732)                                             | <b>4,611 (2,185, 7,037)</b>  | 417 (-1,207, 2,042)         | -362 (-1,157, 433)          | 4,047 (-1,816, 9,910)          |
|                         | 2011           | -3,752 (-9,475, 1,971)                                           | -2194 (-6264, 1876)          | 2,477 (-300, 5,254)         | <b>1,634 (264, 3,004)</b>   | -1,841 (-11,701, 8,018)        |
|                         | 2012           | -1,714 (-4,228, 800)                                             | <b>5,755 (3,972, 7,538)</b>  | <b>7,486 (6,235, 8,737)</b> | <b>3,651 (3,034, 4,268)</b> | <b>15,193 (10,855, 19,532)</b> |
|                         | 2013           | -3,488 (-14,383, 7407)                                           | 4,959 (-3,752, 11,669)       | <b>6,129 (590, 11,667)</b>  | -454 (-3,201, 2,292)        | 5,475 (-13,359, 24,309)        |
|                         |                | Number of hospitalizations – attributable to Influenza B (95%CI) |                              |                             |                             |                                |
| Principal Diagnosis     | Year           | Age group                                                        |                              |                             |                             |                                |
|                         |                | 0-14 years                                                       | 15-64 years                  | 65-84 years                 | ≥85 years                   | All-ages                       |

|                                                                             |                |                              |                              |                             |                           |                                |
|-----------------------------------------------------------------------------|----------------|------------------------------|------------------------------|-----------------------------|---------------------------|--------------------------------|
| Influenza and Pneumonia                                                     | 2001 (Jul-Dec) | 188 (-154, 530)              | 102 (-267, 472)              | <b>495 (105, 886)</b>       | <b>303 (95, 511)</b>      | <b>1,101 (247, 1,955)</b>      |
|                                                                             | 2002           | <b>1,005 (700, 1,310)</b>    | <b>1,080 (748, 1,413)</b>    | 24 (-329, 377)              | <b>325 (135, 515)</b>     | <b>2,435 (1,667, 3,202)</b>    |
|                                                                             | 2003           | -159 (-522, 205)             | 337 (-64, 738)               | 35 (-393, 463)              | -307 (-539, -74)          | -90 (-1,014, 834)              |
|                                                                             | 2004           | 220 (-453, 893)              | 213 (-539, 965)              | 768 (-38, 1575)             | -286 (-730, 158)          | 924 (-806, 2,654)              |
|                                                                             | 2005           | <b>1,101 (506, 1,696)</b>    | <b>833 (161, 1,505)</b>      | 1,067 (345, 1,790)          | -330 (-742, 81)           | <b>2,670 (1,126, 4,215)</b>    |
|                                                                             | 2006           | <b>1,566 (755, 2,377)</b>    | <b>1,236 (312, 2,161)</b>    | -56 (-1,050, 939)           | <b>850 (263, 1,438)</b>   | <b>3,588 (1,467, 5,710)</b>    |
|                                                                             | 2007           | <b>932 (548, 1,315)</b>      | -194 (-634, 247)             | -337 (-813, 139)            | -712 (-1,003, -421)       | -306 (-1,317, 704)             |
|                                                                             | 2008           | <b>1,320 (788, 1,851)</b>    | <b>3,281 (2,666, 3,896)</b>  | 922 (256, 1,588)            | <b>675 (259, 1,091)</b>   | <b>6,196 (4,785, 7,606)</b>    |
|                                                                             | 2009           | -399 (-764, -34)             | -2,052 (-2,476, -1,627)      | <b>553 (90, 1,015)</b>      | <b>396 (103, 688)</b>     | -1,502 (-2,476, -529)          |
|                                                                             | 2010           | -76 (-652, 499)              | -1039 (-1712, -365)          | 603 (-146, 1352)            | <b>836 (352, 1320)</b>    | 300 (-1,247, 1,847)            |
|                                                                             | 2011           | <b>1,929 (1,199, 2,658)</b>  | 216 (-639, 1,071)            | -1040 (-2009, -70)          | -868 (-1499, -236)        | 234 (-1,735, 2,204)            |
|                                                                             | 2012           | <b>781 (308, 1,254)</b>      | <b>1,131 (578, 1,684)</b>    | <b>921 (276, 1,565)</b>     | <b>737 (317, 1158)</b>    | <b>3,566 (2,287, 4,845)</b>    |
|                                                                             | 2013           | <b>1,899 (525, 3,272)</b>    | 1,574 (-29, 3,176)           | -1,277 (-3,189, 635)        | -234 (-1487, 1,018)       | 2,080 (-1,642, 5,801)          |
| Respiratory                                                                 | 2001 (Jul-Dec) | 850 (-1,405, 3105)           | -702 (-2,178, 775)           | <b>2,129 (1,188, 3,070)</b> | <b>416 (37, 795)</b>      | 2,763 (-829, 6,354)            |
|                                                                             | 2002           | <b>3,445 (1,436, 5,455)</b>  | <b>3,767 (2,439, 5,096)</b>  | 986 (136, 1,836)            | <b>788 (441, 1,134)</b>   | <b>8994 (5,766, 12,222)</b>    |
|                                                                             | 2003           | 1,360 (-1,035, 3,754)        | <b>2,351 (747, 3,954)</b>    | -29 (-1,060, 1,001)         | -77 (-501, 347)           | 3637 (-251, 7,525)             |
|                                                                             | 2004           | -649 (-5,085, 3,786)         | -2,024 (-5,030, 981)         | 977 (-965, 2,919)           | -81 (-891, 728)           | -1740 (-9,016, 5,537)          |
|                                                                             | 2005           | 2,563 (-1,362, 6,487)        | 2,651 (-35, 5,337)           | 1,635 (-105, 3,374)         | -411 (-1,161, 339)        | 6,419 (-77, 12,915)            |
|                                                                             | 2006           | 2,422 (-2,923, 7,767)        | 3,040 (-655, 6,735)          | 2,392 (-4, 4,787)           | <b>1,221 (149, 2,293)</b> | <b>9,040 (117, 17,963)</b>     |
|                                                                             | 2007           | <b>4,976 (2,450, 7,503)</b>  | 26 (-1,735, 1,787)           | -1,076 (-2,222, 69)         | -571 (-1102, -40)         | 3,363 (-888, 7,613)            |
|                                                                             | 2008           | <b>3,883 (381, 7,386)</b>    | <b>7,614 (5,155, 10,074)</b> | <b>3,423 (1,819, 5,027)</b> | <b>1,537 (778, 2,296)</b> | <b>16,480 (10,548, 22,412)</b> |
|                                                                             | 2009           | -1937 (-4,342, 469)          | -4537 (-6,235, -2,838)       | <b>1,160 (45, 2,274)</b>    | <b>584 (50, 1,118)</b>    | -4718 (-8,814, -622)           |
|                                                                             | 2010           | <b>4,341 (548, 8,133)</b>    | -1,200 (-3,891, 1,492)       | 126 (-1,678, 1,930)         | <b>936 (53, 1,819)</b>    | 4,071 (-2,435, 10,577)         |
|                                                                             | 2011           | <b>6,506 (1,698, 11,313)</b> | <b>4,220 (800, 7,640)</b>    | -595 (-2,929, 1,740)        | -1,519 (-2,671, -367)     | <b>8,621 (337, 16,905)</b>     |
|                                                                             | 2012           | 2,216 (-900, 5,333)          | <b>2,690 (480, 4,901)</b>    | <b>3,466 (1,913, 5,019)</b> | <b>984 (218, 1,751)</b>   | <b>9,317 (3,938, 14,696)</b>   |
|                                                                             | 2013           | 6,131 (-2,924, 15,185)       | 4,657 (-1,750, 11,065)       | -476 (-5,081, 4,130)        | 1,680 (-604, 3,964)       | 12,463 (-3,190, 28,116)        |
| <b>Number of hospitalizations – attributable to total influenza (95%CI)</b> |                |                              |                              |                             |                           |                                |
| Principal Diagnosis                                                         | Year           | Age group                    |                              |                             |                           |                                |
|                                                                             |                | 0-14 years                   | 15-64 years                  | 65-84 years                 | ≥85 years                 | All-ages                       |
| Influenza and Pneumonia                                                     | 2001 (Jul-Dec) | <b>962 (773, 1,151)</b>      | <b>2,249 (2,043, 2,454)</b>  | <b>624 (412, 836)</b>       | <b>392 (277, 507)</b>     | <b>4,227 (3,761, 4,692)</b>    |
|                                                                             | 2002           | <b>2,157 (1,938, 2,375)</b>  | <b>1,979 (1,740, 2,219)</b>  | <b>1,663 (1,414, 1,911)</b> | <b>1,055 (918, 1,192)</b> | <b>6,850 (6,307, 67,392)</b>   |
|                                                                             | 2003           | <b>2,836 (2,674, 2,998)</b>  | <b>2,949 (2,768, 3,129)</b>  | <b>2,629 (2,441, 2,817)</b> | <b>1,040 (936, 1,144)</b> | <b>9,451 (9,043, 9,858)</b>    |
|                                                                             | 2004           | <b>1,729 (1,509, 1,948)</b>  | <b>2,594 (2,347, 2,841)</b>  | <b>2,686 (2,427, 2,945)</b> | <b>774 (628, 919)</b>     | <b>7,792 (7,235, 8,348)</b>    |
|                                                                             | 2005           | <b>836 (600, 1,072)</b>      | <b>3,231 (2,962, 3,500)</b>  | <b>1,626 (1,344, 1,909)</b> | <b>1,136 (972, 1,300)</b> | <b>6,828 (6,223, 7,434)</b>    |
|                                                                             | 2006           | <b>1,536 (1,309, 1,762)</b>  | <b>2,163 (1,902, 2,423)</b>  | <b>934 (660, 1,208)</b>     | <b>532 (366, 697)</b>     | <b>5,166 (4,580, 5,752)</b>    |
|                                                                             | 2007           | <b>1,611 (1,437, 1,784)</b>  | <b>2,298 (2,097, 2,498)</b>  | <b>1,105 (894, 1,317)</b>   | <b>731 (599, 863)</b>     | <b>5,745 (5,294, 6,197)</b>    |

|             |                |                             |                              |                               |                             |                                |
|-------------|----------------|-----------------------------|------------------------------|-------------------------------|-----------------------------|--------------------------------|
|             | 2008           | <b>1,408 (1,206, 1,609)</b> | <b>2,640 (2,405, 2,876)</b>  | <b>1,772 (1,523, 2,021)</b>   | <b>657 (499, 816)</b>       | <b>6,478 (5,949, 7,007)</b>    |
|             | 2009           | <b>1,722 (1,550, 1,894)</b> | <b>5,306 (5,104, 5,508)</b>  | <b>948 (733, 1,164)</b>       | <b>463 (324, 602)</b>       | <b>8,438 (7,984, 8,892)</b>    |
|             | 2010           | <b>1,174 (50, 1,399)</b>    | <b>2,706 (2,441, 2,970)</b>  | <b>695 (408, 983)</b>         | <b>244 (54, 433)</b>        | <b>4,817 (4,222, 5,413)</b>    |
|             | 2011           | <b>926 (656, 1,195)</b>     | <b>1,972 (1,654, 2,290)</b>  | 202 (-151, 554)               | <i>-391 (-625, -157)</i>    | <b>2,706 (1,988, 3,424)</b>    |
|             | 2012           | <b>1,304 (1,075, 1,534)</b> | <b>4,013 (3,742, 4,284)</b>  | <b>3,269 (2,961, 3,577)</b>   | <b>2,521 (2,316, 2,726)</b> | <b>11,106 (10,492, 11,720)</b> |
|             | 2013           | <b>1,677 (1,389, 1,965)</b> | <b>4,356 (4,018, 4,694)</b>  | <b>1,523 (1,129, 1,918)</b>   | <b>711 (448, 974)</b>       | <b>8,260 (7,490, 9,030)</b>    |
| Respiratory | 2001 (Jul-Dec) | <b>1,911 (681, 3,140)</b>   | <b>5,390 (4,581, 6,198)</b>  | <b>2,114 (1,604, 2,624)</b>   | <b>718 (512, 925)</b>       | <b>10,127 (8,175, 12,080)</b>  |
|             | 2002           | <b>6,712 (5,291, 8,133)</b> | <b>4,253 (3,309, 5,197)</b>  | <b>5,928 (5,330, 6,526)</b>   | <b>2,253 (2,007, 2,499)</b> | <b>19,120 (16,844, 21,396)</b> |
|             | 2003           | <b>5,524 (4,469, 6,579)</b> | <b>7,574 (6,864, 8,284)</b>  | <b>8,271 (7,819, 8,723)</b>   | <b>2,493 (2,306, 2,680)</b> | <b>23,847 (22,139, 25,556)</b> |
|             | 2004           | <b>2,932 (1,504, 4,360)</b> | <b>6,057 (5,085, 7,029)</b>  | <b>6,845 (6,223, 7,467)</b>   | <b>1,376 (1,115, 1,638)</b> | <b>17,243 (14,906, 19,579)</b> |
|             | 2005           | 1,178 (-361, 2,718)         | <b>7,316 (6,258, 8,374)</b>  | <b>6,585 (5,907, 7,264)</b>   | <b>2,376 (2,082, 2,670)</b> | <b>17,435 (14,895, 19,976)</b> |
|             | 2006           | <b>4,037 (2,561, 5,514)</b> | <b>5,925 (4,899, 6,950)</b>  | <b>4,890 (4,232, 5,548)</b>   | <b>1,555 (1,258, 1,852)</b> | <b>16,411 (13,952, 18,870)</b> |
|             | 2007           | <b>4,413 (3,284, 5,542)</b> | <b>5,337 (4,547, 6,127)</b>  | <b>3,225 (2,716, 3,734)</b>   | <b>1,189 (952, 1,426)</b>   | <b>14,165 (12,272, 16,058)</b> |
|             | 2008           | <b>2,675 (1,360, 3,989)</b> | <b>7,665 (6,738, 8,592)</b>  | <b>5,914 (5,316, 6,512)</b>   | <b>1,938 (1,653, 2,223)</b> | <b>18,198 (15,979, 20,418)</b> |
|             | 2009           | 586 (-536, 1,708)           | <b>8,374 (7,578, 9,170)</b>  | <b>2,034 (1,517, 2,551)</b>   | <b>1,196 (946, 1,445)</b>   | <b>12,185 (10,280, 14,091)</b> |
|             | 2010           | <b>1,705 (244, 3,166)</b>   | <b>4,225 (3,183, 5,266)</b>  | 504 (-187, 1,194)             | 123 (-217, 463)             | <b>6,552 (4,053, 9,052)</b>    |
|             | 2011           | <b>3,332 (1,578, 5,086)</b> | <b>2,660 (1,408, 3,913)</b>  | <b>1,747 (901, 2,593)</b>     | <i>-126 (-547, 294)</i>     | <b>7,622 (4,609, 10,634)</b>   |
|             | 2012           | <i>-957 (-2,454, 539)</i>   | <b>7,982 (6,916, 9,048)</b>  | <b>10,375 (9,634, 11,115)</b> | <b>4,724 (4,356, 5,092)</b> | <b>22,119 (19,543, 24,694)</b> |
|             | 2013           | <b>3,997 (2,123, 5,870)</b> | <b>9,090 (7,759, 10,422)</b> | <b>489 (3,950, 5,844)</b>     | <b>1,662 (1,189, 2,135)</b> | <b>19,614 (16,385, 22,843)</b> |

Positive statistically significant estimates are shown in bold and negative statistically significant estimates are presented by italics.
