# Supplementary material for: Estimated hospitalisations attributable to seasonal and pandemic influenza in Australia: 2001- 2013
Source: PubMed Central journal article supplement (PMC7153886; doi:10.1371/journal.pone.0230705), 2020-04-13
Supplement: pone.0230705.s008.pdf [file pone.0230705.s008.pdf]

**Table S5. Sensitivity analyses comparing the generalised additive model (GAM) with a 6 knot per year smoother (original model) with (A) ordinary linear regression model with a seasonal harmonic (sinusoidal model) and with (B) a GAM model with a 4 or 8 knot per year smoother. Results are for the average annual all-age estimated influenza-attributable respiratory hospitalisation rate per 100,000, Australia, 2001-2013 excluding 2009.**

*(A) GAM model and Sinusoidal model*

| GAM model with 6 knots/year (original model)<br>Rate (95% CI) |                   | Linear Regression with annual harmonic seasonal term<br>(sinusoidal model)<br>Rate (95% CI) |                   |
|---------------------------------------------------------------|-------------------|---------------------------------------------------------------------------------------------|-------------------|
| Influenza A                                                   | Influenza B       | Influenza A                                                                                 | Influenza B       |
| 45.4 (34.9, 55.9)                                             | 32.6 (22.8, 42.4) | 40.2 (26.9, 53.5)                                                                           | 23.4 (11.0, 35.9) |

*(B) GAM models with 4 and 8 splines per year*

| GAM model with 4 knots/year<br>Rate (95% CI) |                   | GAM model with 8 knots/year<br>Rate (95% CI) |                   |
|----------------------------------------------|-------------------|----------------------------------------------|-------------------|
| Influenza A                                  | Influenza B       | Influenza A                                  | Influenza B       |
| 46.8 (35.1, 58.5)                            | 42.9 (31.9, 53.9) | 44.8 (35.1, 54.5)                            | 29.5 (20.4, 38.5) |

CI- confidence interval.
